# Supplementary material for: Chemical characterization and formation of secondary organosiloxane aerosol (SOSiA) from OH oxidation of decamethylcyclopentasiloxane
Source: Royal Society of Chemistry journal article supplement (doi:10.1039/d2ea00161f), 2023-01-01
Supplement: d2ea00161f1.pdf [file d2ea00161f1.pdf]

1  
2  
3  
4  
5  
6  
7  
8  
9  
10  
11  
12  
13  
14  
15  
16  
17  
18  
19  
20  
21  
22  
23  
24  
25  
26  
27  
28  
29

**Supplementary Information for:**

**Chemical characterization and formation of secondary organosiloxane aerosol  
(SOSiA) from OH oxidation of decamethylcyclopentasiloxane**

Yanfang Chen<sup>a,b</sup>, Yoojin Park<sup>c</sup>, Hyun Gu Kang<sup>d</sup>, Jiwoo Jeong<sup>a</sup>, Hwajin Kim<sup>a,b\*</sup>

<sup>a</sup>Department of Environmental Health Sciences, Graduate School of Public Health, Seoul National University, 08826 Seoul, South Korea

<sup>b</sup>Institute of Health and Environment, Graduate School of Public Health, Seoul National University, 08826 Seoul, South Korea

<sup>c</sup>Department of Environmental Science and Engineering, College of Engineering, Ewha Womans University, 03760 Seoul, South Korea

<sup>d</sup>Multiphase Chemistry Department, Max Planck Institute for Chemistry, 55128 Mainz, Germany

*For Environ. Sci.: Atmos*

This file includes:

8 Pages

10 Figures

3 Tables

References

30

**Table S1.** Summary of PAM-OFR experiments.

| Experiment ID | AMS | Filter | RH (%) | T (°C) | [H <sub>2</sub> O] (%) | [D <sub>5</sub> ] <sub>init</sub> (ppb) | [D <sub>5</sub> ] <sub>final</sub> (ppb) | OH <sub>exp</sub> (molec. sec. cm <sup>-3</sup> ) | Aging Day |
|---------------|-----|--------|--------|--------|------------------------|-----------------------------------------|------------------------------------------|---------------------------------------------------|-----------|
| 1             | √   |        | 27.76  | 26.57  | 0.953                  |                                         |                                          | 3.85 × 10 <sup>11</sup>                           | 2.97      |
| 2             |     | √      | 29.82  | 20.37  | 0.704                  | 245.16                                  | 135.20                                   | 6.57 × 10 <sup>10</sup>                           | 0.51      |
| 3             |     | √      | 29.43  | 20.78  | 0.713                  | 231.86                                  | 119.29                                   | 1.21 × 10 <sup>11</sup>                           | 0.94      |
| 4             |     | √      | 29.14  | 21.02  | 0.716                  | 224.62                                  | 101.46                                   | 1.92 × 10 <sup>11</sup>                           | 1.48      |
| 5             |     | √      | 28.35  | 23.03  | 0.788                  | 225.94                                  | 88.00                                    | 3.53 × 10 <sup>11</sup>                           | 2.72      |
| 6             |     | √      | 31.35  | 23.54  | 0.899                  | 222.53                                  | 80.61                                    | 4.04 × 10 <sup>11</sup>                           | 3.12      |
| 7             |     | √      | 80.64  | 22.12  | 2.12                   | 229.37                                  | 108.80                                   | 2.09 × 10 <sup>11</sup>                           | 1.61      |
| 8             |     | √      | 79.44  | 23.35  | 2.25                   | 228.39                                  | 83.81                                    | 2.72 × 10 <sup>11</sup>                           | 2.1       |
| 9             |     | √      | 76.07  | 24.02  | 2.24                   | 186.98                                  | 67.94                                    | 4.54 × 10 <sup>11</sup>                           | 3.5       |
| 10            |     | √      | 72.21  | 24.73  | 2.22                   | 222.48                                  | 56.32                                    | 8.24 × 10 <sup>11</sup>                           | 6.36      |
| 11            |     | √      | 73.59  | 24.15  | 2.19                   | 241.04                                  | 56.39                                    | 9.12 × 10 <sup>11</sup>                           | 7.04      |

31 Additional notes for AMS measurement: we've performed a series of experiments with AMS  
 32 measurement, however, the AMS fragments could not provide the molecular composition or  
 33 the formation mechanisms of SOSiA. Thus, only the representative AMS mass spectra was  
 34 used in our study. The RH and temperature were averaged values monitored in the PAM  
 35 chamber with light on. [D<sub>5</sub>]<sub>init</sub> and [D<sub>5</sub>]<sub>final</sub> are the D<sub>5</sub> concentrations measured by PTR-MS  
 36 before and after the reaction.

37

38

39

40

41

42

43

44

**Table S2.** D<sub>5</sub>-SOSiA fragments measured by AMS.

| Formula                                                                     | Nominal Mass | Exact Mass |
|-----------------------------------------------------------------------------|--------------|------------|
| C <sub>2</sub> H <sub>7</sub> Si <sup>+</sup>                               | 59           | 59.0317    |
| C <sub>3</sub> H <sub>9</sub> Si <sup>+</sup>                               | 73           | 73.0474    |
| C <sub>3</sub> H <sub>9</sub> O <sub>2</sub> Si <sub>2</sub> <sup>+</sup>   | 133          | 133.0141   |
| C <sub>5</sub> H <sub>15</sub> O <sub>2</sub> Si <sub>2</sub> <sup>+</sup>  | 147          | 147.0661   |
| C <sub>5</sub> H <sub>15</sub> O <sub>2</sub> Si <sub>2</sub> <sup>+</sup>  | 163          | 163.0611   |
| C <sub>4</sub> H <sub>11</sub> O <sub>3</sub> Si <sub>3</sub> <sup>+</sup>  | 191          | 191.0016   |
| C <sub>3</sub> H <sub>9</sub> O <sub>4</sub> Si <sub>3</sub> <sup>+</sup>   | 193          | 192.9809   |
| C <sub>5</sub> H <sub>15</sub> O <sub>3</sub> Si <sub>3</sub> <sup>+</sup>  | 207          | 207.0329   |
| C <sub>4</sub> H <sub>13</sub> O <sub>4</sub> Si <sub>3</sub> <sup>+</sup>  | 209          | 209.0122   |
| C <sub>7</sub> H <sub>21</sub> O <sub>2</sub> Si <sub>3</sub> <sup>+</sup>  | 221          | 221.0849   |
| C <sub>7</sub> H <sub>21</sub> O <sub>3</sub> Si <sub>3</sub> <sup>+</sup>  | 237          | 237.0798   |
| C <sub>6</sub> H <sub>19</sub> O <sub>4</sub> Si <sub>3</sub> <sup>+</sup>  | 239          | 239.0591   |
| C <sub>4</sub> H <sub>11</sub> O <sub>5</sub> Si <sub>4</sub> <sup>+</sup>  | 251          | 250.9684   |
| C <sub>6</sub> H <sub>17</sub> O <sub>4</sub> Si <sub>4</sub> <sup>+</sup>  | 265          | 265.0204   |
| C <sub>5</sub> H <sub>15</sub> O <sub>5</sub> Si <sub>4</sub> <sup>+</sup>  | 267          | 266.9997   |
| C <sub>7</sub> H <sub>21</sub> O <sub>4</sub> Si <sub>4</sub> <sup>+</sup>  | 281          | 281.0517   |
| C <sub>9</sub> H <sub>27</sub> O <sub>3</sub> Si <sub>4</sub> <sup>+</sup>  | 295          | 295.1037   |
| C <sub>6</sub> H <sub>17</sub> O <sub>6</sub> Si <sub>5</sub> <sup>+</sup>  | 325          | 324.9871   |
| C <sub>5</sub> H <sub>15</sub> O <sub>7</sub> Si <sub>5</sub> <sup>+</sup>  | 327          | 326.9664   |
| C <sub>4</sub> H <sub>13</sub> O <sub>8</sub> Si <sub>5</sub> <sup>+</sup>  | 329          | 328.9457   |
| C <sub>7</sub> H <sub>21</sub> O <sub>6</sub> Si <sub>5</sub> <sup>+</sup>  | 341          | 341.0184   |
| C <sub>6</sub> H <sub>19</sub> O <sub>7</sub> Si <sub>5</sub> <sup>+</sup>  | 343          | 342.9977   |
| C <sub>9</sub> H <sub>27</sub> O <sub>5</sub> Si <sub>5</sub> <sup>+</sup>  | 355          | 355.0705   |
| C <sub>8</sub> H <sub>25</sub> O <sub>6</sub> Si <sub>5</sub> <sup>+</sup>  | 357          | 357.0498   |
| C <sub>11</sub> H <sub>33</sub> O <sub>4</sub> Si <sub>5</sub> <sup>+</sup> | 369          | 369.1225   |
| C <sub>6</sub> H <sub>17</sub> O <sub>8</sub> Si <sub>6</sub> <sup>+</sup>  | 385          | 384.9539   |
| C <sub>7</sub> H <sub>21</sub> O <sub>8</sub> Si <sub>6</sub> <sup>+</sup>  | 401          | 400.9852   |
| C <sub>9</sub> H <sub>27</sub> O <sub>7</sub> Si <sub>6</sub> <sup>+</sup>  | 415          | 415.0372   |
| C <sub>11</sub> H <sub>33</sub> O <sub>6</sub> Si <sub>6</sub> <sup>+</sup> | 429          | 429.0893   |
| C <sub>7</sub> H <sub>21</sub> O <sub>10</sub> Si <sub>7</sub> <sup>+</sup> | 461          | 460.9520   |
| C <sub>9</sub> H <sub>27</sub> O <sub>9</sub> Si <sub>7</sub> <sup>+</sup>  | 475          | 475.0040   |

46

47

48

49

50

51

52

53 **Table S3.** Identified molecular composition of D<sub>5</sub>-SOSiA detected by ESI-MS (“D” refers to  
54 the units of (CH<sub>3</sub>)<sub>2</sub>SiO and “T” refers to CH<sub>3</sub>SiO.).

| No. | Formula                                                          | Monoisotopic mass | Ion mode            | Note                                                                  |
|-----|------------------------------------------------------------------|-------------------|---------------------|-----------------------------------------------------------------------|
| 1   | C <sub>3</sub> H <sub>10</sub> O <sub>3</sub> Si <sub>2</sub>    | 150.0169          | [M-H] <sup>-</sup>  | DT-OH                                                                 |
| 2   | C <sub>5</sub> H <sub>16</sub> O <sub>4</sub> Si <sub>3</sub>    | 224.0356          | [M-H] <sup>-</sup>  | D <sub>2</sub> T-OH                                                   |
| 3   | C <sub>4</sub> H <sub>14</sub> O <sub>5</sub> Si <sub>3</sub>    | 226.0149          | [M-H] <sup>-</sup>  | DT <sub>2</sub> -(OH) <sub>2</sub>                                    |
| 4   | C <sub>5</sub> H <sub>16</sub> O <sub>6</sub> Si <sub>4</sub>    | 284.0024          | [M-H] <sup>-</sup>  |                                                                       |
| 5   | C <sub>4</sub> H <sub>14</sub> O <sub>7</sub> Si <sub>4</sub>    | 285.9817          | [M-H] <sup>-</sup>  |                                                                       |
| 6   | C <sub>7</sub> H <sub>22</sub> O <sub>5</sub> Si <sub>4</sub>    | 298.0544          | [M-H] <sup>-</sup>  | D <sub>3</sub> T-OH                                                   |
| 7   | C <sub>6</sub> H <sub>20</sub> O <sub>6</sub> Si <sub>4</sub>    | 300.0337          | [M-H] <sup>-</sup>  | D <sub>2</sub> T <sub>2</sub> -(OH) <sub>2</sub>                      |
| 8   | C <sub>5</sub> H <sub>16</sub> O <sub>8</sub> Si <sub>5</sub>    | 343.9692          | [M-H] <sup>-</sup>  |                                                                       |
| 9   | C <sub>7</sub> H <sub>22</sub> O <sub>7</sub> Si <sub>5</sub>    | 358.0212          | [M-H] <sup>-</sup>  | D <sub>3</sub> T-OH-SiO <sub>2</sub>                                  |
| 10  | C <sub>6</sub> H <sub>20</sub> O <sub>8</sub> Si <sub>5</sub>    | 360.0005          | [M-H] <sup>-</sup>  | D <sub>2</sub> T <sub>2</sub> -(OH) <sub>2</sub> -SiO <sub>2</sub>    |
| 11  | C <sub>7</sub> H <sub>22</sub> O <sub>8</sub> Si <sub>5</sub>    | 374.0161          | [M-H] <sup>-</sup>  | D <sub>2</sub> T <sub>2</sub> -OH-CH <sub>2</sub> OH-SiO <sub>2</sub> |
| 12  | C <sub>8</sub> H <sub>26</sub> O <sub>7</sub> Si <sub>5</sub>    | 374.0525          | [M+Na] <sup>+</sup> | D <sub>3</sub> T <sub>2</sub> -(OH) <sub>2</sub>                      |
| 13  | C <sub>7</sub> H <sub>24</sub> O <sub>8</sub> Si <sub>5</sub>    | 376.0318          | [M+Na] <sup>+</sup> | D <sub>2</sub> T <sub>3</sub> -(OH) <sub>3</sub>                      |
| 14  | C <sub>6</sub> H <sub>22</sub> O <sub>9</sub> Si <sub>5</sub>    | 378.0110          | [M-H] <sup>-</sup>  | DT <sub>4</sub> -(OH) <sub>4</sub>                                    |
| 15  | C <sub>8</sub> H <sub>26</sub> O <sub>8</sub> Si <sub>5</sub>    | 390.0474          | [M+Na] <sup>+</sup> | D <sub>2</sub> T <sub>3</sub> -(OH) <sub>2</sub> -CH <sub>2</sub> OH  |
| 16  | C <sub>7</sub> H <sub>24</sub> O <sub>9</sub> Si <sub>5</sub>    | 392.0267          | [M+Na] <sup>+</sup> | DT <sub>4</sub> -(OH) <sub>3</sub> -CH <sub>2</sub> OH                |
| 17  | C <sub>9</sub> H <sub>28</sub> O <sub>9</sub> Si <sub>5</sub>    | 420.0580          | [M+Na] <sup>+</sup> | DT <sub>4</sub> -OH-(CH <sub>2</sub> OH) <sub>3</sub>                 |
| 18  | C <sub>9</sub> H <sub>28</sub> O <sub>8</sub> Si <sub>6</sub>    | 432.0400          | [M-H] <sup>-</sup>  |                                                                       |
| 19  | C <sub>8</sub> H <sub>26</sub> O <sub>9</sub> Si <sub>6</sub>    | 434.0192          | [M-H] <sup>-</sup>  |                                                                       |
| 20  | C <sub>7</sub> H <sub>22</sub> O <sub>11</sub> Si <sub>7</sub>   | 477.9547          | [M-H] <sup>-</sup>  |                                                                       |
| 21  | C <sub>9</sub> H <sub>28</sub> O <sub>10</sub> Si <sub>7</sub>   | 492.0067          | [M-H] <sup>-</sup>  |                                                                       |
| 22  | C <sub>8</sub> H <sub>26</sub> O <sub>11</sub> Si <sub>7</sub>   | 493.9860          | [M-H] <sup>-</sup>  |                                                                       |
| 23  | C <sub>10</sub> H <sub>32</sub> O <sub>10</sub> Si <sub>7</sub>  | 508.0380          | [M-H] <sup>-</sup>  |                                                                       |
| 24  | C <sub>9</sub> H <sub>28</sub> O <sub>12</sub> Si <sub>8</sub>   | 551.9735          | [M-H] <sup>-</sup>  |                                                                       |
| 25  | C <sub>11</sub> H <sub>34</sub> O <sub>11</sub> Si <sub>8</sub>  | 566.0255          | [M-H] <sup>-</sup>  |                                                                       |
| 26  | C <sub>10</sub> H <sub>32</sub> O <sub>12</sub> Si <sub>8</sub>  | 568.0048          | [M-H] <sup>-</sup>  |                                                                       |
| 27  | C <sub>9</sub> H <sub>28</sub> O <sub>14</sub> Si <sub>9</sub>   | 611.9402          | [M-H] <sup>-</sup>  |                                                                       |
| 28  | C <sub>11</sub> H <sub>34</sub> O <sub>13</sub> Si <sub>9</sub>  | 625.9923          | [M-H] <sup>-</sup>  |                                                                       |
| 29  | C <sub>12</sub> H <sub>38</sub> O <sub>13</sub> Si <sub>9</sub>  | 642.0236          | [M-H] <sup>-</sup>  |                                                                       |
| 30  | C <sub>11</sub> H <sub>34</sub> O <sub>15</sub> Si <sub>10</sub> | 685.9590          | [M-H] <sup>-</sup>  |                                                                       |
| 31  | C <sub>13</sub> H <sub>40</sub> O <sub>14</sub> Si <sub>10</sub> | 700.0111          | [M-H] <sup>-</sup>  |                                                                       |
| 32  | C <sub>9</sub> H <sub>38</sub> O <sub>19</sub> Si <sub>9</sub>   | 701.9931          | [M-H] <sup>-</sup>  |                                                                       |
| 33  | C <sub>14</sub> H <sub>44</sub> O <sub>14</sub> Si <sub>10</sub> | 716.0424          | [M-H] <sup>-</sup>  |                                                                       |
| 34  | C <sub>13</sub> H <sub>42</sub> O <sub>15</sub> Si <sub>10</sub> | 718.0216          | [M-H] <sup>-</sup>  |                                                                       |
| 35  | C <sub>13</sub> H <sub>44</sub> O <sub>16</sub> Si <sub>10</sub> | 736.0322          | [M-H] <sup>-</sup>  |                                                                       |

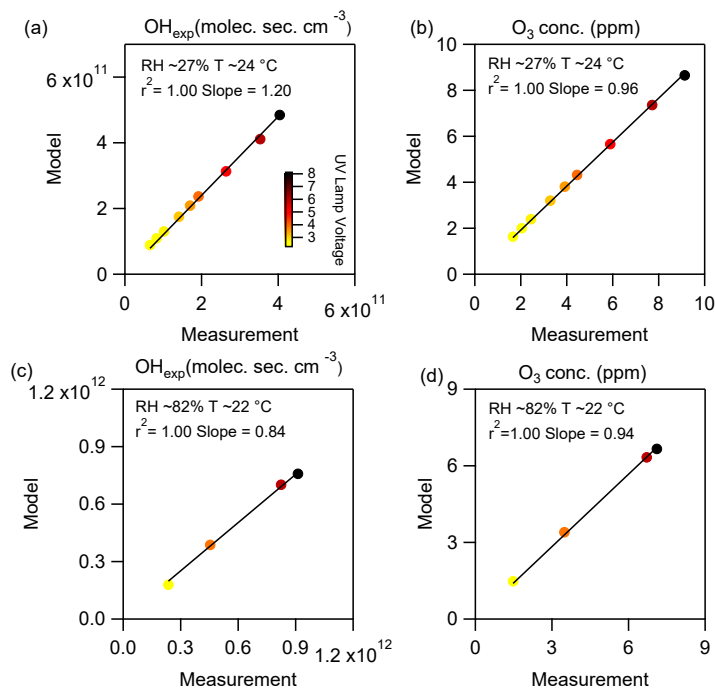

55

56 **Figure S1.** Comparison between modeled and measurement results for  $\text{OH}_{\text{exp}}$  (a and c) and  $\text{O}_3$   
 57 mixing ratios (b and d) across different offline  $\text{OH}_{\text{exp}}$  calibration experiments. The modeled  
 58 results were calculated from the KinSim chemical kinetic solver (4.6.1)<sup>1</sup> with the OFR185  
 59 mechanism from Rowe et al.<sup>2</sup>

60

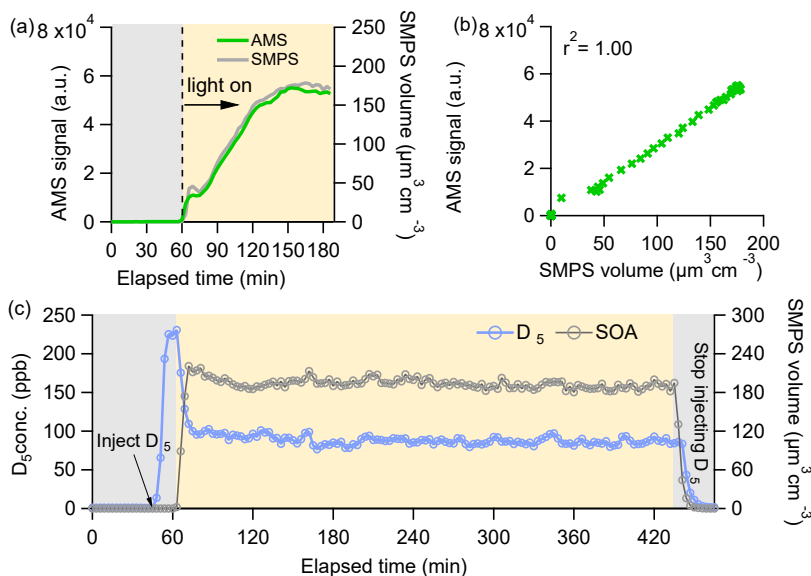

61

62 **Figure S2.** (a) Time evolution and (b) scatterplot of SOSiA measured by AMS and SMPS  
 63 during experiment 1. (c) Time series of  $\text{D}_5$  measured by PTR-MS and SMPS volume  
 64 concentration during a representative filter collection experiment. The grey area indicates  
 65 PAM-OFR light off period and light yellow is the light on period. Unfortunately, the PTR-MS  
 66 was not available during the experiment 1. The fluctuation of the time series at the beginning  
 67 is probably due to the unstable injection of  $\text{D}_5$ .

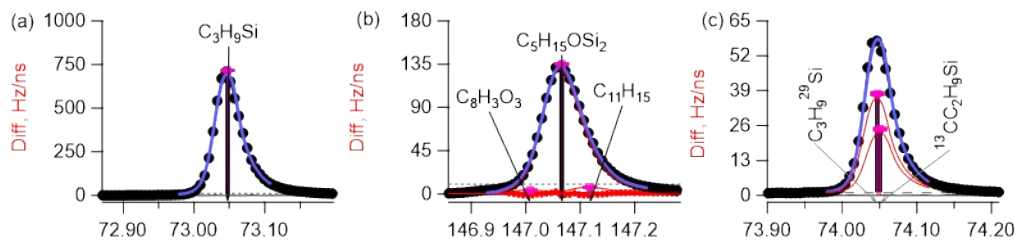

68

69 **Figure S3.** AMS high-resolution mass spectra of Si-containing fragments at (a)  $m/z$  73, (b)  $m/z$

70 147 and (c)  $m/z$  74.

71

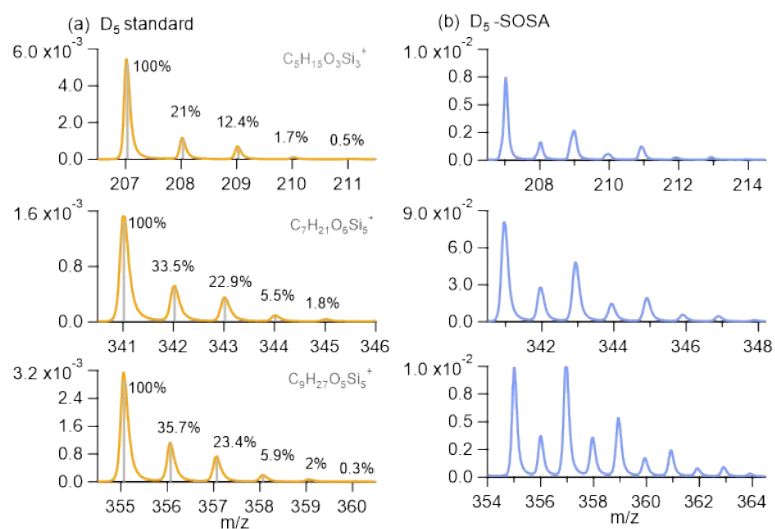

72

73 **Figure S4.** Raw mass spectra of (a)  $D_5$  standard and (b)  $D_5$ -SOSiA detected with AMS. The

74 height of vertical grey lines corresponds to the expected isotopic ratios.

75

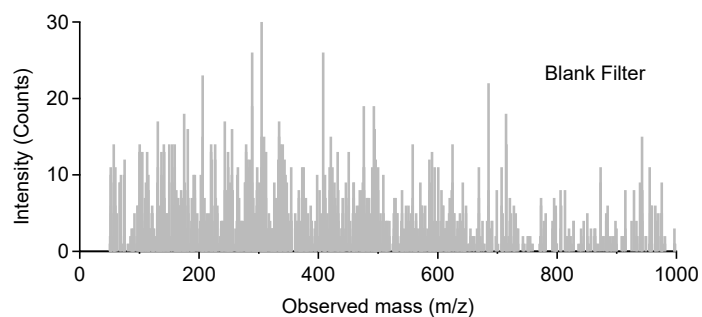

76

77 **Figure S5.** ESI-MS (-) mass spectrum of blank filter.

78

79

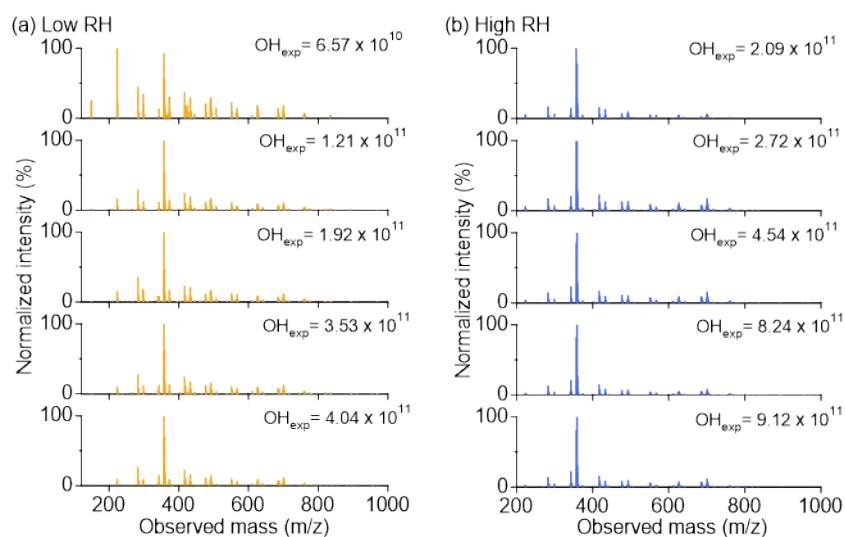

80

81 **Figure S6.** ESI-MS (-) mass spectrum of D<sub>5</sub>-SOSiA at different OH exposure. The peak  
 82 intensities are normalized by setting the abundance of the largest peak in each spectrum to 100.

83

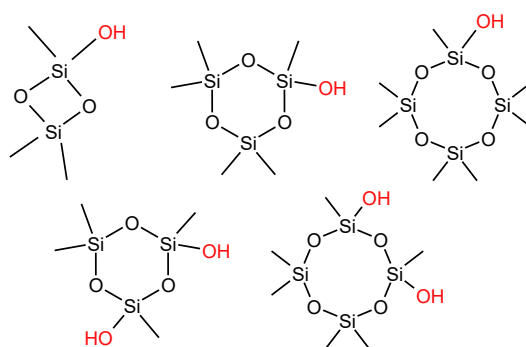

84

85 **Figure S7.** Possible structures of identified small silanols (DT-OH, D<sub>2</sub>T-OH and D<sub>3</sub>T-OH )  
 86 and siloxandiols (DT<sub>2</sub>-(OH)<sub>2</sub> and D<sub>2</sub>T<sub>2</sub>-(OH)<sub>2</sub>).

87

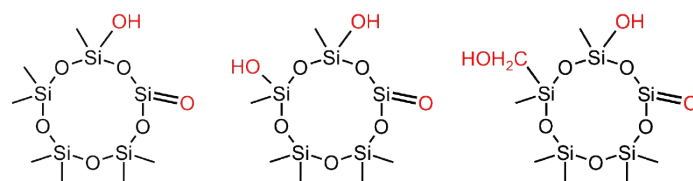

88

89 **Figure S8.** Possible structures of ring opening products (D<sub>3</sub>T-OH-SiO<sub>2</sub>, D<sub>2</sub>T<sub>2</sub>-(OH)<sub>2</sub>-SiO<sub>2</sub> and  
 90 D<sub>2</sub>T<sub>2</sub>-OH-CH<sub>2</sub>OH-SiO<sub>2</sub>).

91

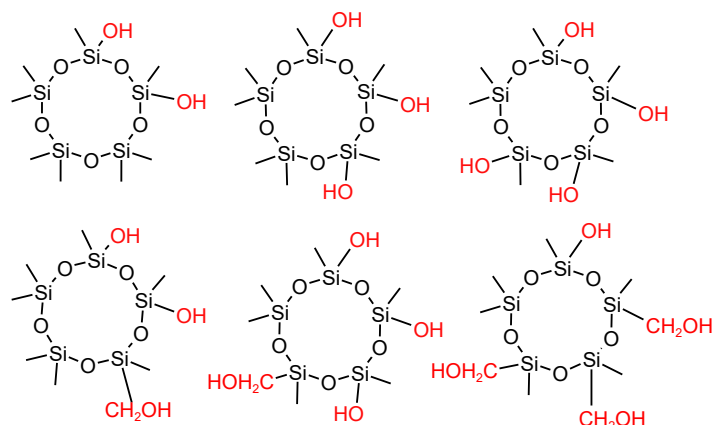

92

93 **Figure S9.** Possible structures of identified monomers ( $D_3T_2-(OH)_2$ ,  $D_2T_3-(OH)_3$ ,  $DT_4-(OH)_4$ ,

94

$D_2T_3-(OH)_2-CH_2OH$ ,  $DT_4-(OH)_3-CH_2OH$  and  $DT_4-OH-(CH_2OH)_3$ ).

95

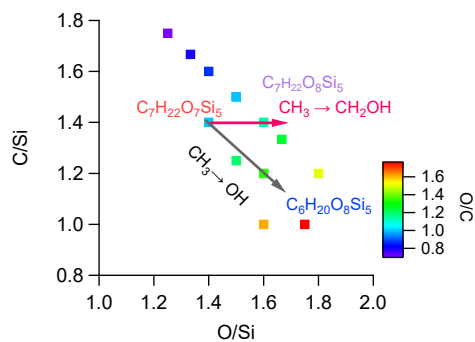

96

97 **Figure S10.** Plots of C/Si versus O/Si for ring-opening SOSiA products between  $m/z$  200-400.

98

## 99 References

- 100 1. Z. Peng and J. L. Jimenez, KinSim: A Research-Grade, User-Friendly, Visual Kinetics  
 101 Simulator for Chemical-Kinetics and Environmental-Chemistry Teaching, *Journal of*  
 102 *Chemical Education*, 2019, **96**, 806-811.
- 103 2. J. P. Rowe, A. T. Lambe and W. H. Brune, Technical Note: Effect of varying the  
 104  $\lambda = 185$  and  $254$  nm photon flux ratio on radical generation in oxidation flow  
 105 reactors, *Atmos. Chem. Phys.*, 2020, **20**, 13417-13424.

106
